# Supplementary material for: Defect-Rich Monolayer MoS2 as a Universally Enhanced Substrate for Surface-Enhanced Raman Scattering
Source: MDPI journal article supplement (doi:10.3390/nano12060896), 2022-03-08
Supplement: s1 [file s1]

## Supporting Information

# Defect-Rich Monolayer MoS<sub>2</sub> as a Universally Enhanced Substrate for Surface-Enhanced Raman Scattering

Shiyu Sun <sup>1,†</sup>, Jingying Zheng <sup>2,†</sup>, Ruihao Sun <sup>1</sup>, Dan Wang <sup>1</sup>, Guanliang Sun <sup>1</sup>, Xingshuang Zhang <sup>1</sup>, Hongyu Gong <sup>1</sup>, Yong Li <sup>1</sup>, Meng Gao <sup>1</sup>, Dongwei Li <sup>1,\*</sup>, Guanchen Xu <sup>1,\*</sup> and Xiu Liang <sup>1,\*</sup>

<sup>1</sup> Key Laboratory for High Strength Lightweight Metallic Materials of Shandong Province (HM), Advanced Materials Institute, Qilu University of Technology (Shandong Academy of Sciences), Jinan 250014, China; sysun0313@163.com (S.S.); srh1645@163.com (R.S.); Wangdan1910@163.com (D.W.); 13793994223@163.com (G.S.); xszhang@qlu.edu.cn (X.Z.); hygong@sdas.org (H.G.); yongli@sdas.org (Y.L.); mgao@sdas.org (M.G.)

<sup>2</sup> College of Materials Science and Engineering, Fuzhou University, Fuzhou 350108, China; jyzheng@fzu.edu.cn

\* Correspondence: dwli@sdas.org (D.L.); gcxu@sdas.org (G.X.); xliang@sdas.org (X.L.)

† These authors contributed equally to this work.

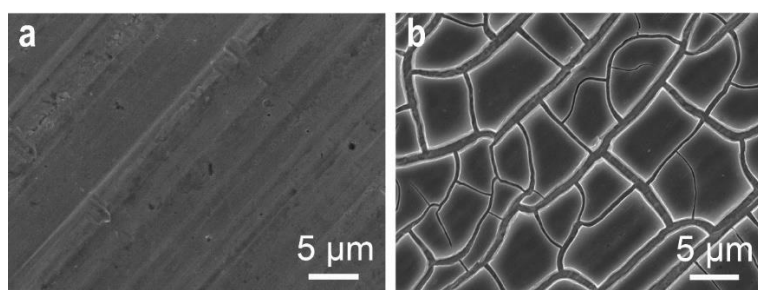

**Figure S1.** (a, b) SEM image of the untreated and electroplated surface of Mo foil.

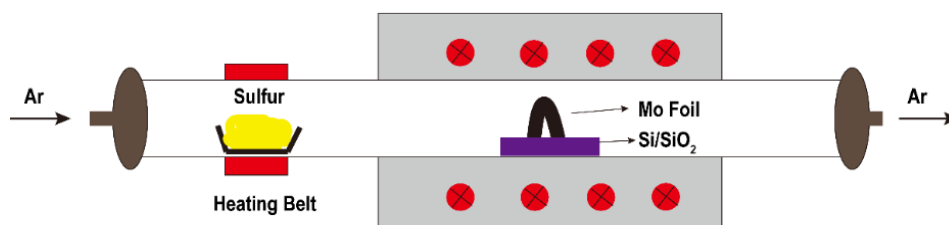

**Figure S2.** Schematic illustration of CVD system growing monolayer MoS<sub>2</sub>.

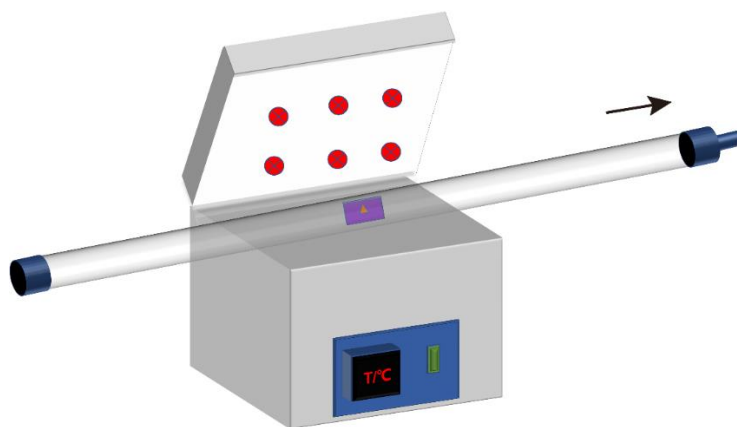

**Figure S3.** Schematic illustration of the etching process of monolayer MoS<sub>2</sub>. Etching of monolayer MoS<sub>2</sub> is performed at temperatures below the growth temperature. The MoS<sub>2</sub> grown on the SiO<sub>2</sub>/Si substrate is placed in the center of the glass tube, which is sealed at one end and connected to a vacuum oil pump at the other end.

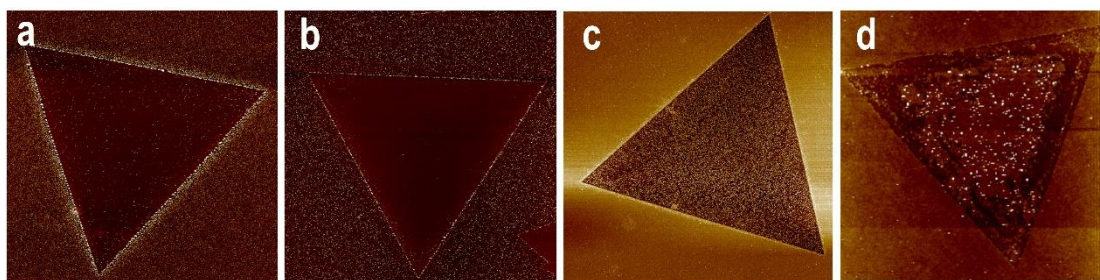

**Figure S4.** AFM image of (a) monolayer MoS<sub>2</sub>, (b) mild etching monolayer MoS<sub>2</sub>, (c) moderate etching monolayer of MoS<sub>2</sub>, (d) severe etching monolayer of MoS<sub>2</sub>.

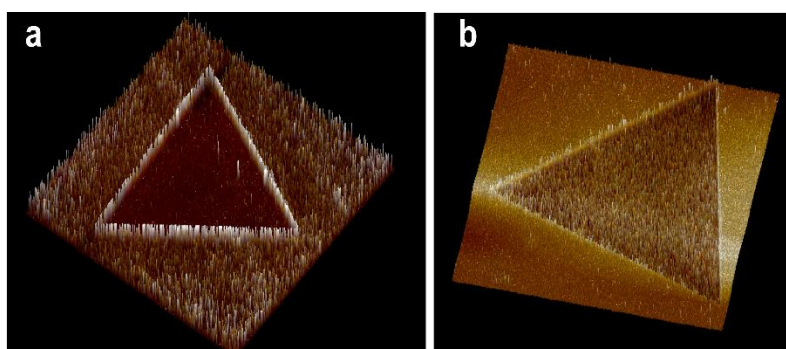

**Figure S5.** 3D AFM image of (a) monolayer MoS<sub>2</sub> and (b) moderate etching monolayer MoS<sub>2</sub>.

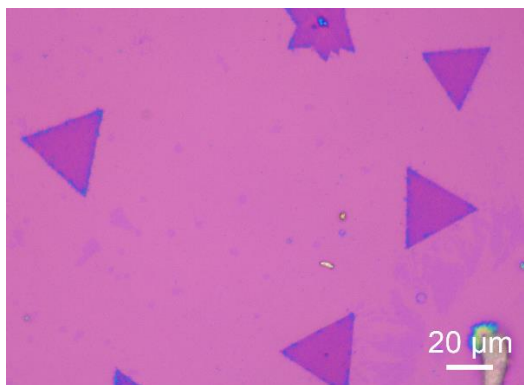

**Figure S6.** Optical photograph of dye molecules added dropwise on unetched monolayer MoS<sub>2</sub>.

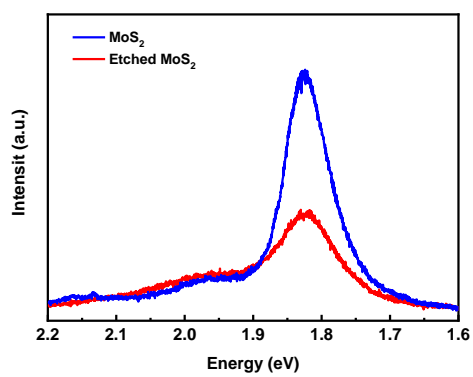

**Figure S7.** PL spectra of monolayer MoS<sub>2</sub> and etched monolayer MoS<sub>2</sub>.

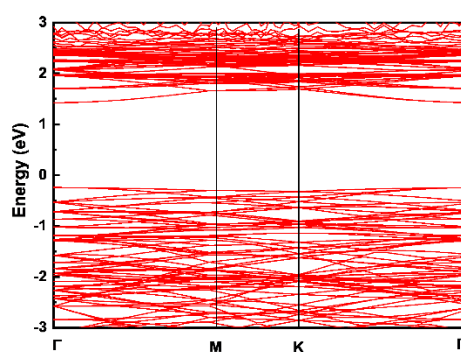

**Figure S8.** The calculated band structures of MoS<sub>2</sub> take Fermi level as reference.

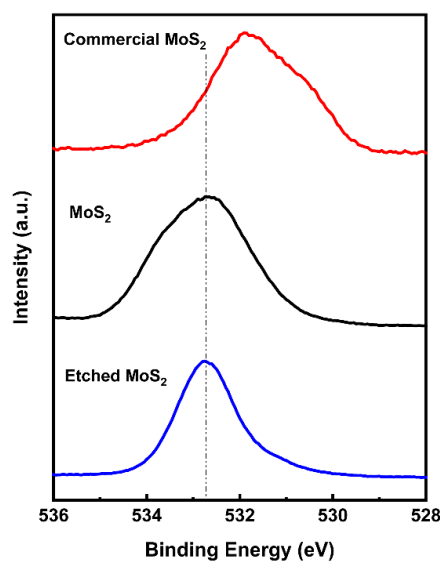

**Figure S9.** O 1s XPS spectrum of commercial MoS<sub>2</sub> powder, CVD grown monolayer MoS<sub>2</sub>, and etched monolayer MoS<sub>2</sub>.

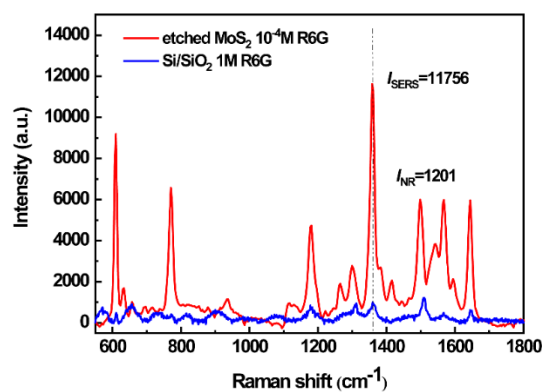

**Figure S10.** The enhancement factor (EF) of etched MoS<sub>2</sub> overlay 10<sup>-4</sup>M R6G. Under the same test conditions as “Materials and Methods”, we tested the Raman spectra of 10<sup>-4</sup> M R6G on etched MoS<sub>2</sub> substrates and the Raman spectra of 1 M R6G on SiO<sub>2</sub>/Si substrates. The final enhancement factor was obtained 10<sup>5</sup> by selecting the data where 1360 cm<sup>-1</sup> was located using the calculation formula.

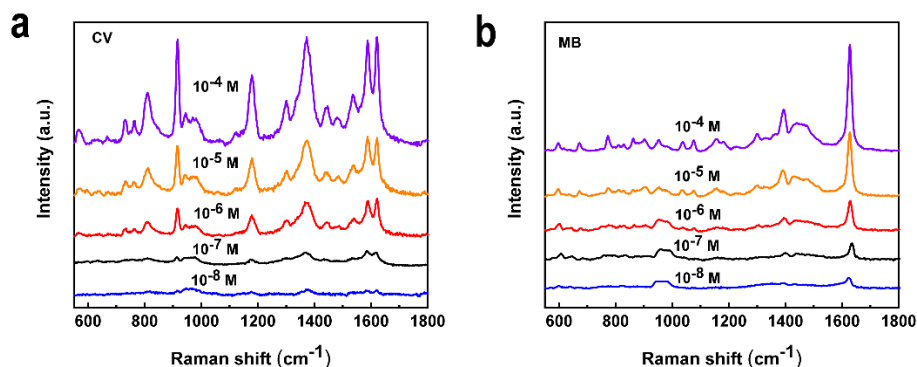

**Figure S11.** SERS measurements of (a) crystal violet (CV), and (b) methylene blue (MB) molecules probes on etched monolayer MoS<sub>2</sub> substrates.

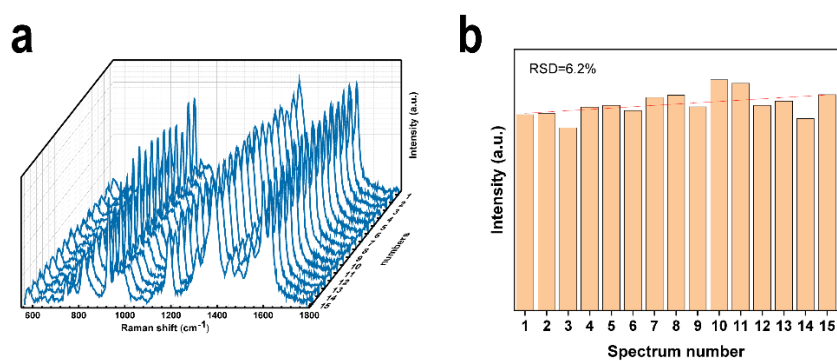

**Figure S12.** (a) SERS spectra of CV ( $10^{-5}$  M) coated on etched MoS<sub>2</sub> taken from 15 randomly chosen spots. (b) Histogram distribution of the Raman intensities at 1620 cm<sup>-1</sup>.

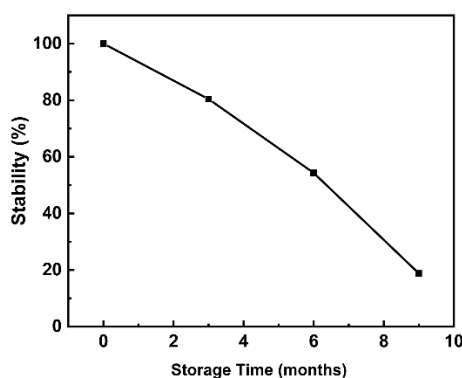

**Figure S13.** The stability ratio of  $10^{-5}$  M R6G coated on etched MoS<sub>2</sub>.

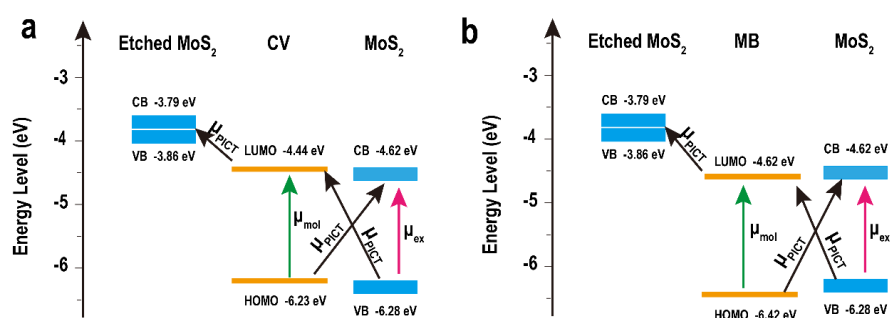

**Figure S14.** Energy level diagram and charge transfer transitions in the diagram comparing the charge-transfer pathways in (a) CV/etched MoS<sub>2</sub> and (b) MB/etched MoS<sub>2</sub>.

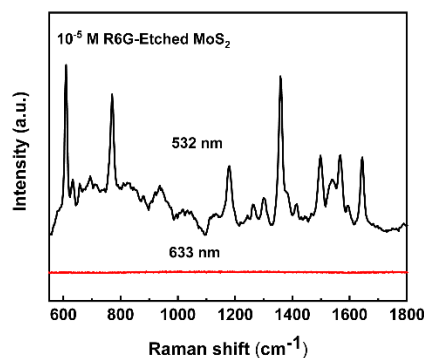

**Figure S15.** The Raman signals of 10<sup>-5</sup> M R6G coated on etched MoS<sub>2</sub> were irradiated at 532 nm and 633 nm, respectively.

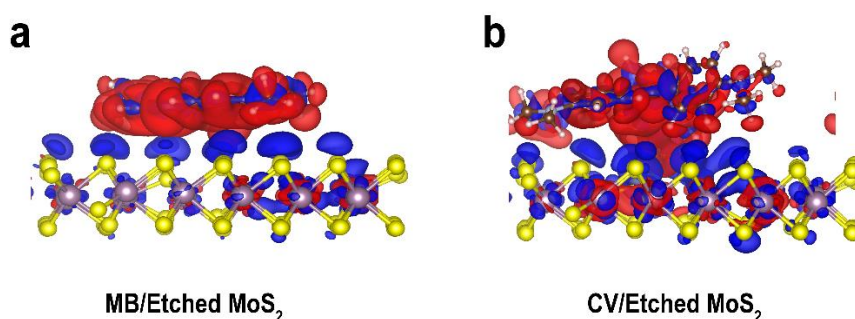

**Figure S16.** Side views of the electron density difference isosurface for MB (a), and CV (b) molecule absorbed on etched monolayer MoS<sub>2</sub>.
